# Supplementary material for: Temperature modulates dengue virus epidemic growth rates through its effects on reproduction numbers and generation intervals
Source: PLOS journal article supplement (doi:10.1371/journal.pntd.0005797), 2017-07-19
Supplement: S2 (10.1371/journal.pntd.0005797.s002) [file journal.pntd.0005797.s002]

## S2 Appendix. Diurnally fluctuating hazards for mosquito mortality and EIP.

With temperature fluctuating diurnally [10,41], we considered a time-varying mosquito survivorship hazard corresponding to time-varying temperatures. We began by first generating temperature-dependent mortality rates  $\Lambda(T)$  based on diurnally fluctuating temperature profiles  $T(t)$ . To translate these rates into time-varying hazards  $h(t)$  (defined as the conditional probability of an event happening within a short time  $\Delta t$  given that it has not yet happened), we applied

$$h(t) = 1 - \exp(-\Lambda(T(t)) \Delta t), \quad (\text{S5})$$

where  $\Delta t$  is the smallest time increment we considered. We then applied these hazards iteratively to a survivorship function  $S(t)$  (defined as the complement of the distribution function  $F(t)$  of the random variable describing the timing of death) beginning at  $S(0) = 1$  and updating

$$S(t + \Delta t) = S(t)(1 - h(t + \Delta t)) \quad (\text{S6})$$

for each  $\Delta t$ . Obtaining the probability density associated with the random variable in question was achieved by first calculating  $F(t) = 1 - S(t)$  and then differentiating  $F(t)$  with respect to  $t$  to obtain  $f(t)$ . This same process was applied to capture time-varying effects of temperature on mortality and EIP by substituting  $\Lambda(T)$  for  $\mu(T)$  and  $1/\text{EIP}(T)$ , respectively.
