# Supplementary material for: Temperature modulates dengue virus epidemic growth rates through its effects on reproduction numbers and generation intervals
Source: PLOS journal article supplement (doi:10.1371/journal.pntd.0005797), 2017-07-19
Supplement: S9 (10.1371/journal.pntd.0005797.s009) [file journal.pntd.0005797.s009]

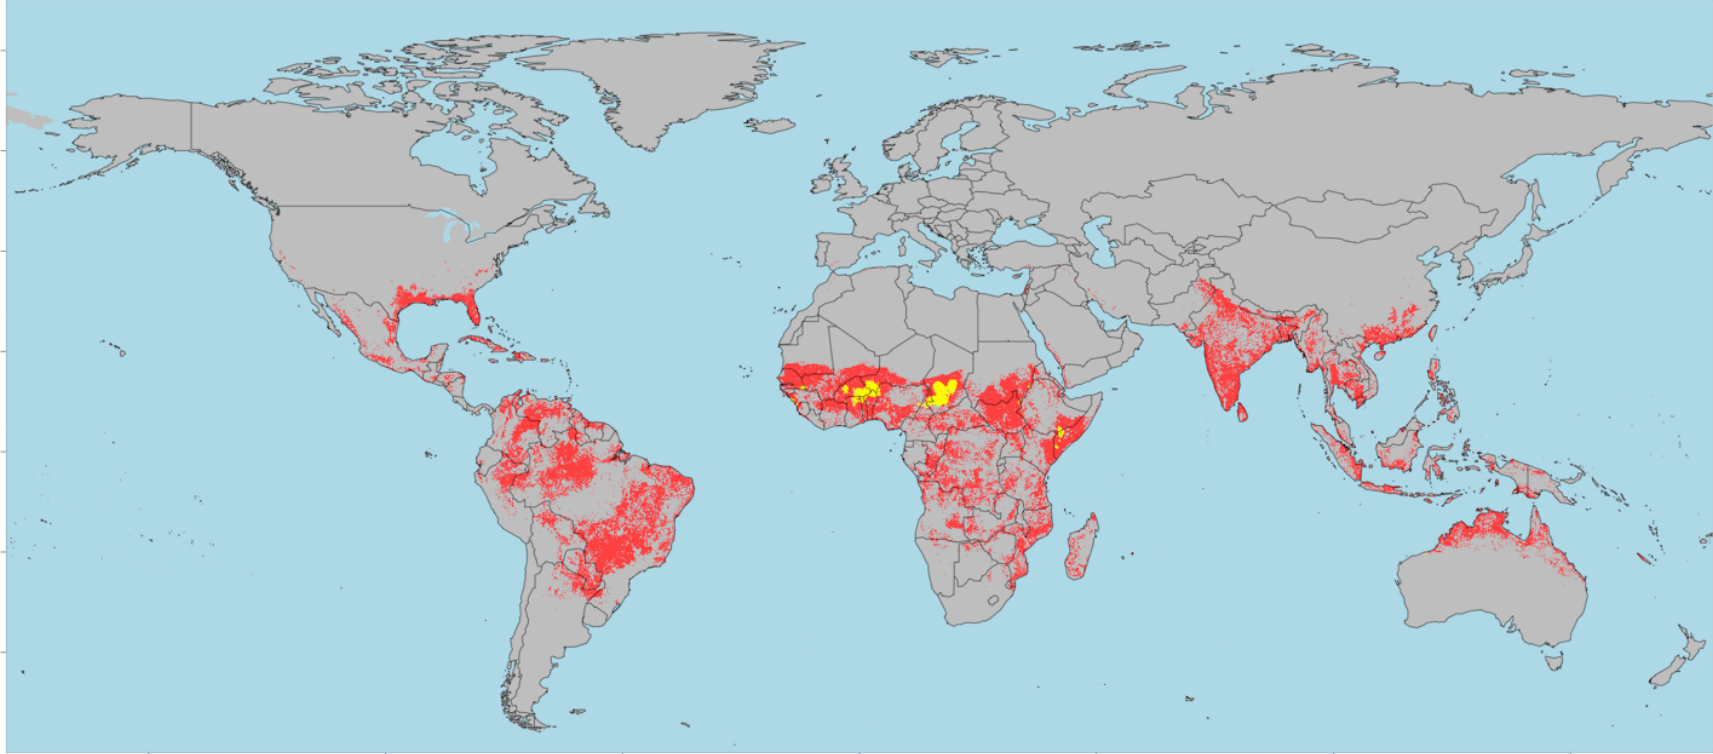

**S7 Figure. Regions that fall into different categories with respect to their relationship to peak temperature of 33 °C by 2050 in the month of March.** These classifications are based on the RCP 4.5 temperature change scenario [36]. Regions are classified by color according to whether they are projected to remain below (red), newly exceed (yellow), or further surpass (green) the peak temperature of 33 °C for maximizing epidemic growth rate,  $r$ . Gray areas are masked from this analysis due to their unsuitability for dengue transmission [39].
